# 1 Title

## 2 **Deep-learning-based cell composition analysis from tissue expression profiles.**

3 Kevin Menden<sup>§</sup>, Mohamed Marouf, Anupriya Dalmia, Peter Heutink, Stefan Bonn<sup>§</sup>

4

5 <sup>§</sup> Correspondence to [sbonn@uke.de](mailto:sbonn@uke.de) & [Kevin.Menden@dzne.de](mailto:Kevin.Menden@dzne.de)

## 6 Abstract

7 We present Scaden, a deep neural network for cell deconvolution that uses gene  
8 expression information to infer the cellular composition of tissues. Scaden is trained  
9 on single cell RNA-seq data to engineer discriminative features that confer robustness  
10 to bias and noise, making complex data preprocessing and feature selection  
11 unnecessary. We demonstrate that Scaden outperforms existing deconvolution  
12 algorithms in both precision and robustness, across tissues and species. A single  
13 trained network reliably deconvolves bulk RNA-seq and microarray, human and  
14 mouse tissue expression data. Due to this stability and flexibility, we surmise that deep  
15 learning-based cell deconvolution will become a mainstay across data types and  
16 algorithmic approaches. Scaden's comprehensive software package is easy to use on  
17 novel as well as diverse existing expression datasets available in public resources,  
18 deepening the molecular and cellular understanding of developmental and disease  
19 processes.

## 20 Keywords

21 Cell Deconvolution, Deep Learning, Machine Learning, single cell RNA sequencing,  
22 RNA sequencing, Deep Sequencing, Source Separation.

## 23 Introduction

24 The analysis of tissue-specific gene expression using Next Generation Sequencing  
25 (RNA-seq) is a centerpiece of the molecular characterization of biological and medical  
26 processes<sup>1</sup>. A well-known limitation of tissue-based RNA-seq is that it typically  
27 measures average gene expression across many molecularly diverse cell types that  
28 can have distinct cellular states<sup>2</sup>. A change in gene expression between two conditions  
29 can therefore be attributed to a change in the cellular composition of the tissue or a  
30 change in gene expression in a specific cell population, or a mixture of the two. To  
31 deconvolve systematic differences in cell type composition is especially important in  
32 systems with cellular proliferation (e.g. cancer) or cellular death (e.g. neuronal loss in  
33 Neurodegenerative Diseases)<sup>3</sup>.

34 To account for this problem, several computational cell deconvolution methods have  
35 been proposed during the last years<sup>4,5</sup>. These algorithms attempt to calculate an  
36 approximation of the cell type composition of a given gene expression sample, such  
37 that systematic differences in cellular abundance between samples can be detected,  
38 interpreted, and possibly corrected for. Current algorithms utilize gene expression  
39 profiles (GEPs) of cell type-specifically expressed genes to estimate cellular fractions  
40 using linear regression<sup>4</sup>. While the best performing linear regression algorithms for  
41 deconvolution seem to be variations of Support Vector Regression (SVR)<sup>6-10</sup>, the  
42 selection of an optimal GEP is a field of active research<sup>10,11</sup>. Indeed, it has been  
43 recently shown that the design of the GEP is the most important factor in most  
44 deconvolution methods, as results from different algorithms strongly correlate given  
45 the same GEP<sup>11</sup>.

46 In theory, an optimal GEP should contain a set of genes that are predominantly  
47 expressed within each cell population of a complex sample<sup>12</sup>. They should be stably

48 expressed across experimental conditions, for example across health and disease,  
49 and resilient to experimental noise and bias. The negative impact of bias on  
50 deconvolution performance can be partly improved by using large, heterogeneous  
51 GEP matrices<sup>11</sup>. It is therefore not surprising that recent advancement in cell  
52 deconvolution relied almost exclusively on sophisticated algorithms to normalize the  
53 data and engineer optimal GEPs<sup>10</sup>.

54 While GEP-based approaches lay the foundational basis of modern cell deconvolution  
55 algorithms, we hypothesize that Deep Neural Networks (DNNs) could create optimal  
56 features for cell deconvolution, without relying on the complex generation of GEPs.  
57 DNNs such as multilayer perceptrons are universal function approximators that  
58 achieve state-of-the-art performance on classification and regression tasks. We  
59 theorize that by using gene expression information as network input, hidden layer  
60 nodes of the DNN would represent higher-order latent representations of cell types  
61 that are robust to input noise and technical bias.

62 An obvious limitation of DNNs is the requirement for large training data to avoid  
63 overfitting of the machine learning model. While ground truth information on tissue  
64 RNA-seq cell composition is scarce, one can use single cell RNA-seq (scRNA-seq)  
65 data to obtain virtually unlimited *in silico* tissue datasets of predefined cell  
66 composition<sup>7-9,13-15</sup>. This is achieved by sub-sampling and subsequently merging cells  
67 from scRNA-seq datasets and is limited only by the availability of tissue-specific  
68 scRNA-seq data. It is to be noted that scRNA-seq data suffers from known biases,  
69 such as drop-out, that RNA-seq data is not subject to<sup>16</sup>. While this complicates the use  
70 of scRNA-seq data for GEP design<sup>8</sup>, we surmise that latent network nodes could  
71 represent features that are robust to such biases.

72 Based on these assumptions we developed a single-cell-assisted deconvolutional  
73 DNN (Scaden) that uses simulated bulk RNA-seq samples for training and predicts  
74 cell type proportions for input expression samples of cell mixtures. Scaden is trained  
75 on publicly available scRNA- and RNA-seq data, does not rely on specific GEP  
76 matrices, and automatically infers informative features. Finally, we show that Scaden  
77 deconvolves expression data into cell types with higher precision and robustness than  
78 existing methods that rely on GEP matrices, across tissues, species, and data types.

## 79 Results

### 80 Scaden Overview, Model Selection, and Training

81 The basic architecture of Scaden is a DNN that takes gene counts of RNA-seq data  
82 as input and outputs predicted cell fractions (Fig. 1). To optimize the performance of  
83 the DNN, it is trained on data that contains both the gene expression and the real cell  
84 fraction information (Fig. 1A). The network then adjusts its weights to minimize the  
85 error between the predicted cell fractions and the real cell fractions (Fig. 1B).

86 For the model selection and training we made use of the virtually unlimited amount of  
87 artificial bulk RNA-seq datasets with defined composition that can be generated *in*  
88 *silico* from published scRNA-seq and RNA-seq datasets (simulated tissues) (Fig. 1,  
89 Tables S1 & S2). The only constraint being that the scRNA-seq and RNA-seq data  
90 must come from the same tissue as the bulk data subject to deconvolution.

91 To find the optimal DNN architecture for cell deconvolution, we performed leave-one-  
92 dataset-out cross validation on simulated peripheral blood mononuclear cell (PBMC)  
93 tissue, training on mixtures of three scRNA-seq datasets and evaluating the  
94 performance on simulated tissue from a fourth scRNA-seq dataset (Table S1 & S3).

95 The final Scaden model is an ensemble of the three best performing models and the  
96 final cell type composition estimates are the averaged predictions of all three  
97 ensemble models (Fig. S1, Table S4).  
98

### A Simulated training data

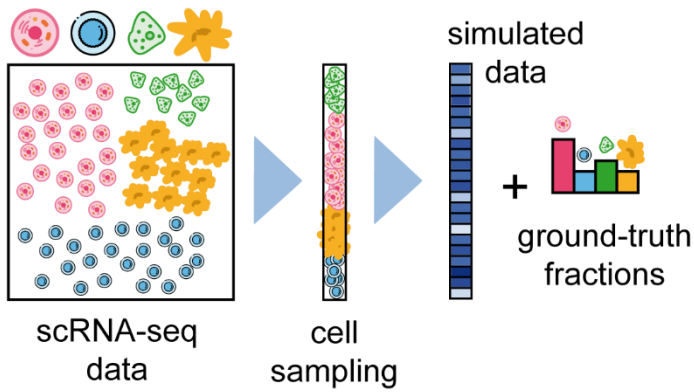

### B Scaden training

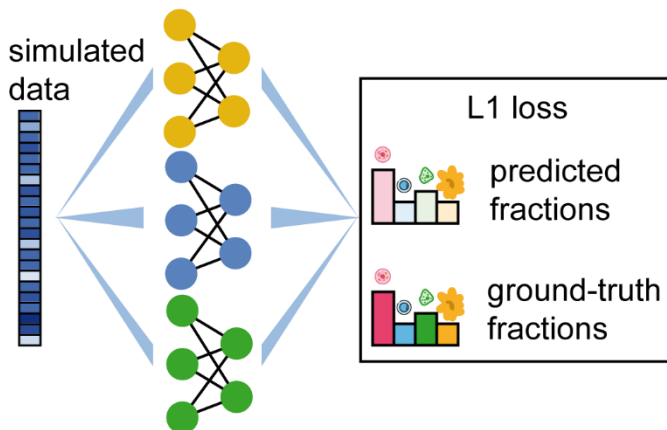

### C Scaden predictions

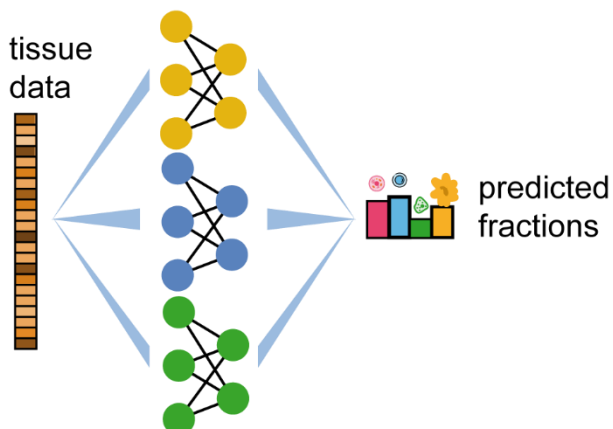

99

100 **Figure 1** Overview of training data generation and cell type deconvolution with Scaden. A:  
101 Artificial bulk samples are generated by subsampling random cells from a scRNA-seq datasets  
102 and merging their expression profiles. B: Model training and parameter optimization on  
103 simulated tissue RNA-seq data by comparing cell fraction predictions to ground-truth cell  
104 composition. C: Cell deconvolution of real tissue RNA-seq data using Scaden.

105

106 To get an initial estimate of Scaden's deconvolution fidelity we measured the root  
107 mean square error (RMSE), Lin's concordance correlation coefficient (CCC)<sup>17</sup>,  
108 Pearson's correlation coefficient (r), and the slope and intercept of the regression fitted  
109 for actual and predicted cell fractions. To this end, 32,000 human PBMC, 14,000  
110 human pancreas, 6,000 human ascites, and 30,000 mouse brain simulated tissue  
111 samples were generated for network training and evaluation (Table S2). We then  
112 compared Scaden to four state-of-the-art GEP-based cell deconvolution algorithms,  
113 CIBERSORT (CS)<sup>6</sup>, CIBERSORTx (CSx)<sup>7</sup>, MuSiC<sup>8</sup>, and Cell Population Mapping  
114 (CPM)<sup>9</sup>. While CS relies on hand-curated GEP matrices, CSx, MuSiC, and CPM can  
115 generate GEPs using scRNA-seq data as input.

116 We first evaluated the deconvolution performance on simulated PBMC data, since  
117 curated GEP matrices and RNA-seq datasets with associated ground truth cell type  
118 compositions are available for human PBMCs, making this tissue uniquely suited  
119 toward deconvolution performance evaluation. Scaden was trained on simulated data  
120 from all datasets but a held-out dataset while CSx, MuSiC and CPM used a GEP  
121 generated from a scRNA-seq dataset excluding a held-out dataset (e.g. data6k,  
122 data8k, donorA). Subsequently the algorithms were tested on 500 simulated PBMC  
123 samples from a held-out scRNA-seq dataset (e.g. donorC) (Fig. 2A & B, Table S5).  
124 For CS we used the PBMC-optimized LM22 GEP matrix<sup>6</sup> and tested performance on  
125 the 500 simulated PBMC samples from a held-out scRNA-seq dataset (e.g. donorC).

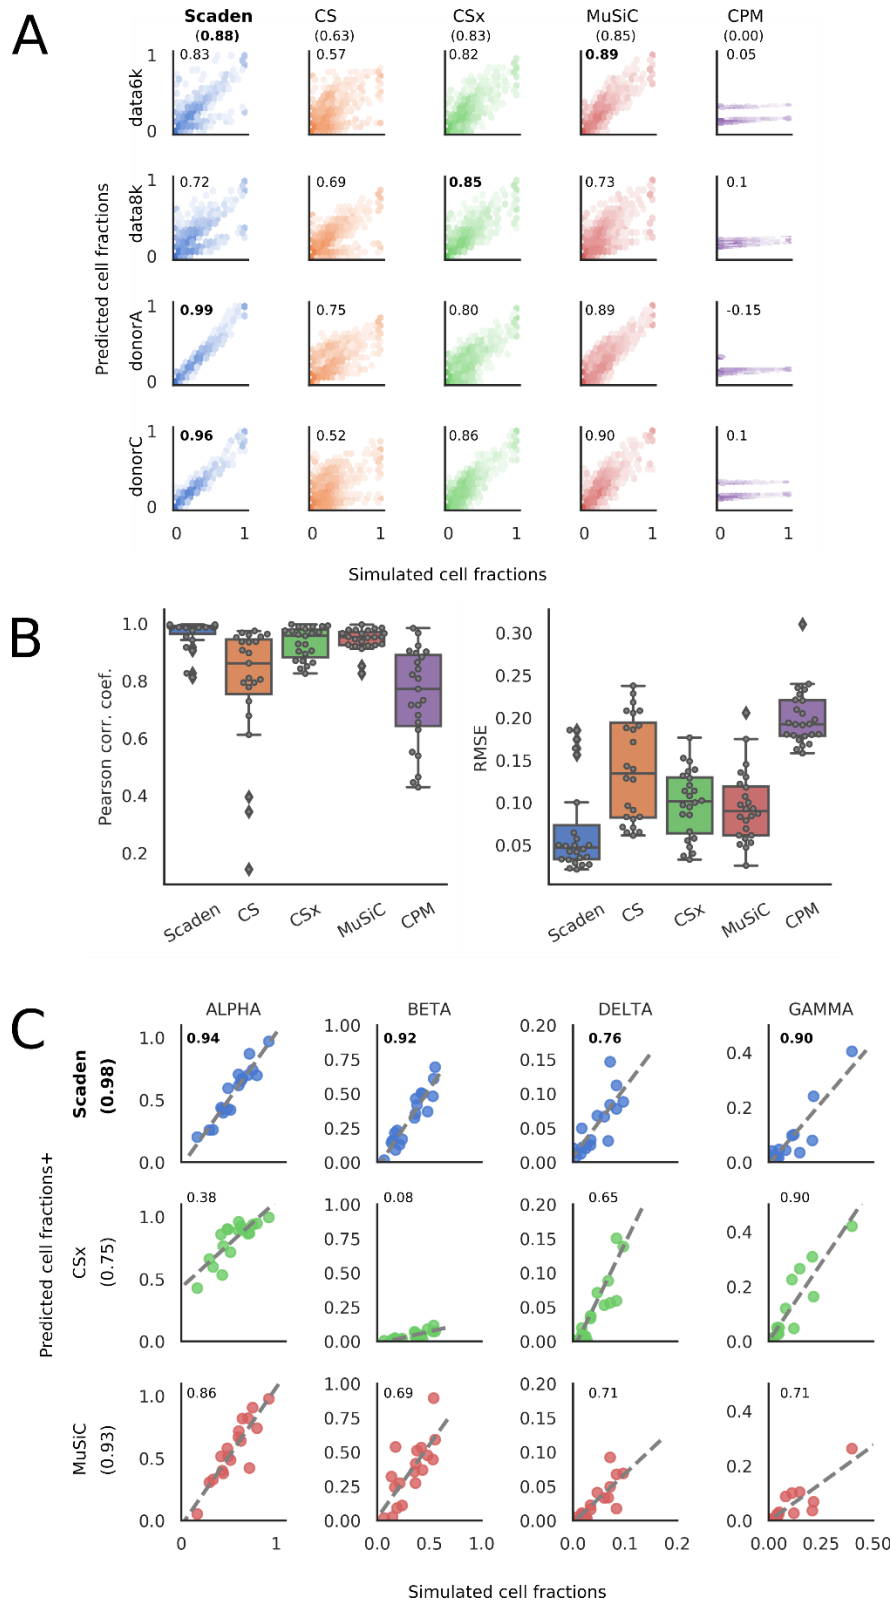

126

127 **Figure 2** Deconvolution performance on simulated tissue data A: Ground truth values (x-axis)

128 plotted against cell type fraction estimates (y-axis) for predictions made on simulated data

129 from four PBMC scRNA-seq datasets. Darker color in a hexbin corresponds to more data

130 points falling into this bin. Numbers inside the plotting area signify CCC values, the overall

131 CCC is shown in parenthesis below the algorithm name. B: Boxplots of  $r$  and RMSE values  
132 for simulated PBMC data. C: Per-cell-type scatterplots of ground truth (x-axis) and predicted  
133 values (y-axis) for Scaden, CSx, and MuSiC on artificial pancreas data<sup>18</sup>. Numbers inside the  
134 plotting area signify CCC values.

135

136 For two of four test datasets (donorA, donorC), Scaden obtained the highest CCC and  
137 lowest RMSE, followed by CSx, MuSiC, CS, and CPM (Fig. 2A, Table S5). CSx and  
138 MuSiC obtain the highest CCC values for the data8k and data6k datasets,  
139 respectively. Overall, Scaden obtains the highest CCC and lowest RMSE (0.88, 0.08,  
140 respectively), followed by MuSiC(0.85, 0.10), CSx(0.83, 0.11), CS (0.63 0.15), and  
141 CPM (0, 0.20) (Fig. 2A). As expected, all algorithms that use scRNA-seq data as  
142 reference perform good in this scenario with the notable exception of CPM. We want  
143 to mention that CPM was not primarily developed for cell deconvolution, but merely  
144 incorporates this as an additional feature. On average, Scaden also obtained the  
145 highest correlation and the best intercept and slope values on simulated PBMC data  
146 (Table S5).

147 A specific feature of the MuSiC algorithm is that it preferentially weighs genes  
148 according to low inter-subject and intra-cell cluster variability for its GEP, which  
149 increases deconvolution robustness when high expression heterogeneity is observed  
150 between human subjects, for example<sup>8</sup>. To understand if Scaden can utilize multi-  
151 subject information to increase its deconvolution performance, we trained Scaden,  
152 CSx, and MuSiC on scRNA-seq pancreas data from several subjects<sup>19</sup> and assessed  
153 the performance on a separate simulated pancreas RNA-seq dataset<sup>18</sup> (Fig. 2C, Table  
154 S6). To allow for direct comparison, we chose the same pancreas training and test  
155 datasets that were used in the original MuSiC publication (Table S1). To enable  
156 Scaden to leverage the heterogeneity of multi-subject data, training data was



157 generated separately for every subject in the dataset (see Methods). CSx cannot profit  
158 from multi-subject data but performed well on the artificial PBMC datasets and was  
159 therefore included in the comparison. The best performance is achieved by Scaden  
160 (CCC = 0.98), closely followed by MuSiC (CCC = 0.93), while CSx does not perform  
161 as well (CCC = 0.75) (Fig. 2C, Table S6). This provides strong evidence that Scaden,  
162 by separating training data generation for each subject, can learn inter-subject  
163 heterogeneity and outperform specialized multi-subject algorithms such as MuSiC on  
164 the cell-type deconvolution task.

165 Additionally, we wanted to test how the best performing deconvolution algorithms  
166 Scaden, MuSiC, and CSx behave when unknown cell content is part of the mixture.  
167 To test this, all cells falling into the 'Unknown' category were removed from the training  
168 or reference datasets but added to the simulated mixture samples at fixed percentages  
169 (5%, 10%, 20%, 30%) (see Methods). Scaden obtains the highest CCC for all tested  
170 percentages of unknown cell content (Fig. S2, Table S8). The general deconvolution  
171 performance declines linearly with increasing percentage of unknown content for all  
172 tested algorithms (Fig. S2, Table S8), indicating that Scaden, MuSiC, and CSx have a  
173 similar robustness against unknown mixture content.

#### 174 Robust deconvolution of bulk expression data

175 The true use case of cell deconvolution algorithms is the cell fraction estimation of  
176 tissue RNA-seq data. We therefore assessed the performance of Scaden, CS, CSx,  
177 MuSiC, and CPM to deconvolve two publicly available human PBMC bulk RNA-seq  
178 datasets, for which ground-truth cell composition information was measured using flow  
179 cytometry (Fig. 3A, Tables S7 & S9). We will refer to these datasets that consists of  
180 12 samples each as PBMC1<sup>20</sup> and PBMC2<sup>10</sup>. Deconvolution for all methods was

181 performed as described in the previous section, with the difference that data from all  
182 four PBMC scRNA-seq datasets was now deployed for Scaden training.

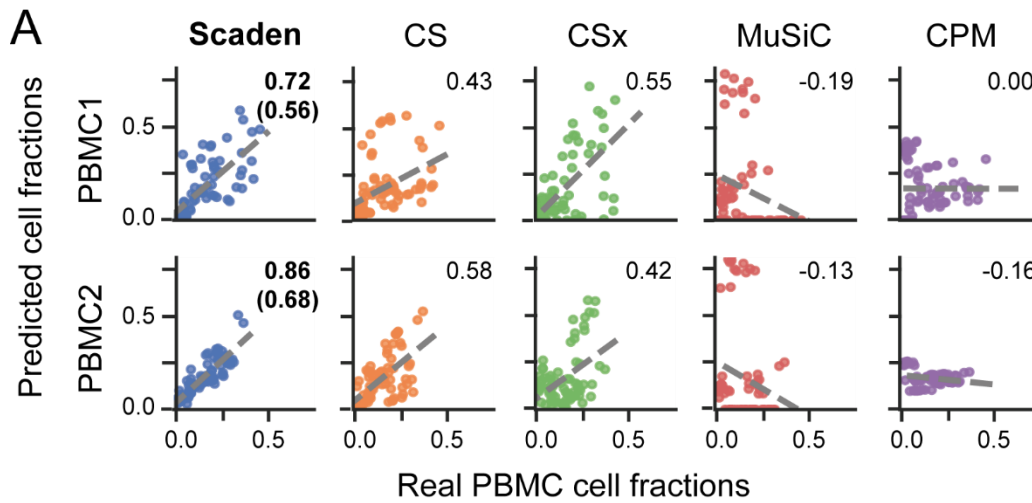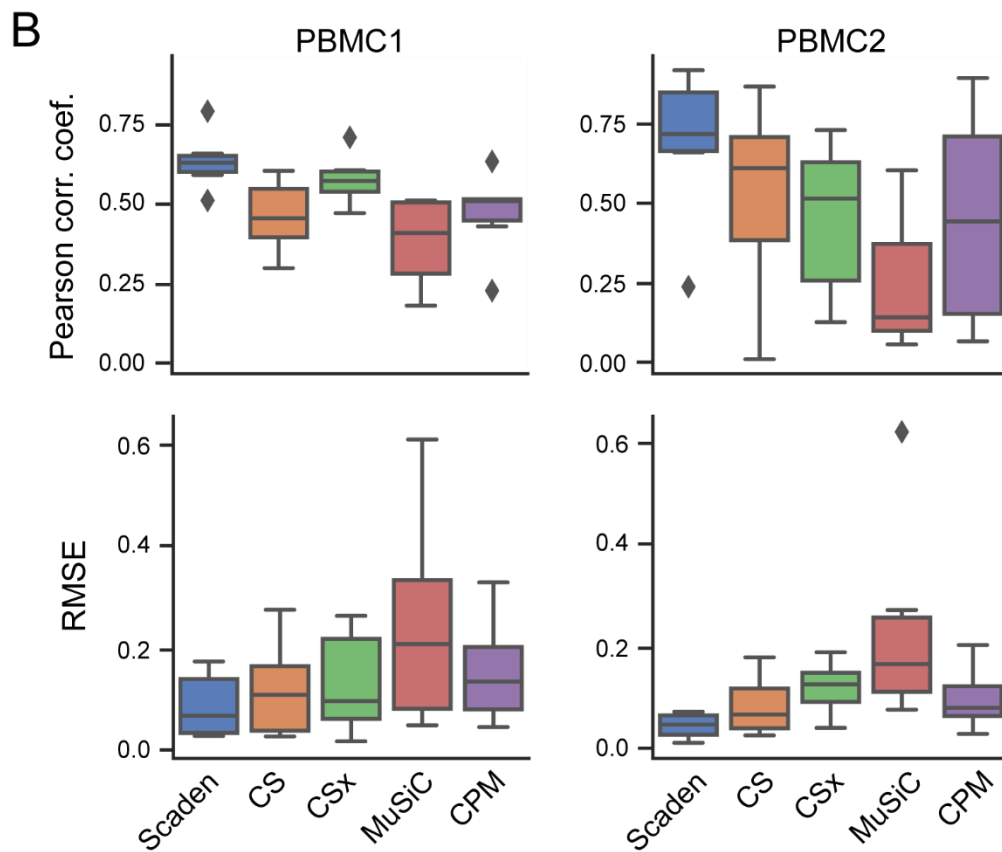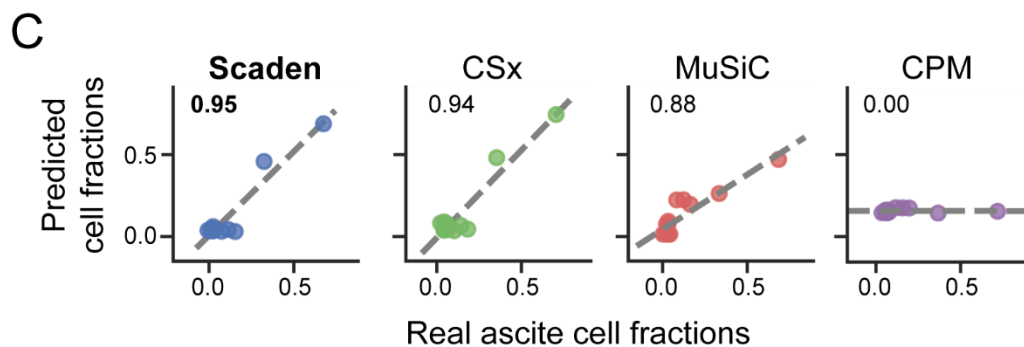

183

184 **Figure 3** *Deconvolution of real tissue RNA-seq data* A: Per-cell-type scatterplots of ground  
185 truth (x-axis) and predicted values (y-axis) for Scaden, CS, CSx, MuSiC, and CPM on real  
186 PBMC1 and PBMC2 cell fractions. Numbers inside the plotting area signify CCC values. For  
187 Scaden, the CCC using only scRNA-seq training data (in parenthesis) and the CCC using  
188 mixed scRNA-seq and RNA-seq training data is shown. B: Boxplots of  $r$  (first row) and RMSE  
189 (second row) values for real PBMC1 (first column) and PBMC2 (second column) data. C: Per-  
190 cell-type scatterplots of ground truth (x-axis) and predicted values (y-axis) for Scaden, CSx,  
191 MuSiC, and CPM on real ascite cell fractions. Numbers inside the plotting area signify CCC  
192 values.

193  
194 On the PBMC1 dataset, Scaden obtained the highest CCC and lowest RMSE (0.56,  
195 0.13), while CSx (0.55, 0.16) and CS (0.43, 0.15) performed well yet significantly worse  
196 than Scaden (Fig. 3A, Tables S8 & S9). CPM (0, 0.18) and MuSiC (-0.19, 0.32) both  
197 failed to deconvolve the cell fractions of the PBMC1 data. Scaden also obtained the  
198 best CCC and RMSE (0.68, 0.08) on the PBMC2 dataset, while CS (0.58, 0.10) and  
199 CSx (0.42, 0.13) obtained good deconvolution results. Similar to the PBMC1 data  
200 deconvolution results, CPM (-0.16, 0.11) as well as MuSiC (-0.13, 0.30) did not  
201 perform well on the PBMC2 deconvolution task. In addition to CCC and RMSE metrics,  
202 Scaden achieves the best correlation, intercept and slope on both PBMC datasets  
203 (Tables S9 & S10).

204 An additional algorithmic feature of Scaden is that it seamlessly integrates increasing  
205 amounts of training data, which can be of different types, such as a combination of  
206 simulated tissue and real tissue data with cell fraction information. In theory, even  
207 limited real tissue training data could make Scaden robust to data type bias and  
208 consequently improve Scaden's deconvolution performance on real tissue data. We  
209 therefore trained Scaden on a mix of simulated PBMC (500 samples) and real PBMC2  
210 (12 samples) data and evaluated its performance on real PBMC1 data (Fig. 3A, S3,

211 Table S9). While the training contained only ~2% real data, Scaden's CCC increased  
212 from 0.56 to 0.72 and the RMSE decreased from 0.13 to 0.10. We observed similar  
213 performance increases when Scaden was trained on simulated PBMC and real  
214 PBMC1 data and evaluated on real PBMC2 data (Fig. 3A, S3, Table S10).

215 We next evaluated Scaden's performance on real ascites RNA-seq data, for which  
216 scRNA-seq and FACS cell proportion data is available<sup>21</sup> (Table S7). It is noteworthy  
217 that RNA-seq, scRNA-seq, and FACS data was generated for the same samples,  
218 which potentially entails reduced experimental and technical bias and consequently  
219 higher deconvolution fidelity for the ascites data as compared to the PBMC data. We  
220 did not evaluate CS's performance on the ascites data as there was no optimized  
221 ascites GEP available. For Scaden, CSx, CPM and MuSiC we used scRNA-seq data  
222 to generate either simulated tissue data for training (Scaden) or a reference GEP (CSx,  
223 CPM, MuSiC). Scaden, CSx, CPM, and MuSiC all accurately predict the cell type  
224 compositions for the three real ascites samples, while CPM does not perform well (Fig.  
225 3C, Table S11). The highest CCC and lowest RMSE were achieved by Scaden (0.95,  
226 0.06), followed by CSx (0.94, 0.07), MuSiC (0.88, 0.08), and CPM (0, 0.18). This  
227 further validates that Scaden reliably deconvolves tissue RNA-seq data into the  
228 constituent cell fractions and that very accurate deconvolution results can be obtained  
229 if reference and target datasets are from the same experiment. Again, we stress that  
230 CPM was not primarily developed for cell deconvolution, but mainly for a different  
231 functionality.

232 We next wanted to assess if Scaden's deconvolution performance is robust across  
233 species. We therefore tested whether a Scaden model trained on mouse brain scRNA-  
234 seq data could generate reasonable cell composition estimations for real human brain  
235 RNA-seq data (Table S7). To this end, Scaden was trained on artificial data generated

236 from five mouse brain scRNA-seq datasets and predicted the cell fractions on human  
237 post-mortem RNA-seq brain samples (390 prefrontal cortex samples) from the  
238 ROSMAP study<sup>22</sup>. Ground-truth cell fractions were not available for this data, which is  
239 why we used Braak stages<sup>23</sup> that correspond to Alzheimer's disease severity and  
240 correlate with the degree of neuronal loss. Overall, Scaden's cell fraction predictions  
241 capture the increased neuronal loss with increasing Braak stage (Fig. S4).  
242 Interestingly, the largest drop in neural percentage is observed at stage 5, when the  
243 neurodegeneration typically reaches the prefrontal cortex of the brain. By learning  
244 robust features, Scaden reliably deconvolves RNA-seq data in a cross-species  
245 comparison.

246 Given the robustness with which Scaden predicts tissue RNA-seq cell fractions using  
247 scRNA-seq training data, even across species, we next wanted to investigate if a  
248 scRNA-seq-trained Scaden model can also deconvolve other data types. To this end,  
249 we measured the deconvolution performance on a bulk PBMC microarray dataset (20  
250 samples)<sup>6</sup> of a Scaden model trained on scRNA-seq and RNA-seq PBMC data (see  
251 above). We compared Scaden to CS using the microarray-derived LM22 matrix. CS  
252 achieved a slightly higher CCC and slightly lower total RMSE (0.72, 0.11) than Scaden  
253 (0.71, 0.13), while Scaden obtained the highest average CCC (0.50) compared to CS  
254 (0.39) (Fig. S5, Table S12). Notably in this scenario, Scaden was trained entirely on  
255 simulated data and RNA-seq data, while CS's LM22 GEP was optimized on PBMC  
256 microarray data.

257 Overall, we provide strong evidence that Scaden robustly deconvolves tissue data  
258 across tissues, species, and even data types.

## 259 Discussion

260 Scaden is the first deep learning-based cell deconvolution algorithm. In many  
261 instances, it compares favorably in both prediction robustness and accuracy to existing  
262 deconvolution algorithms that rely on GEP design and linear regression. We believe  
263 that Scaden's performance relies to a large degree on the inherent feature engineering  
264 of the DNN. The network does not only select features (genes) for regression, it also  
265 creates novel features that are optimal for the regression task in the nodes of the  
266 hidden layers. These hidden features are non-linear combinations of the input features  
267 (gene expression), which makes it notoriously difficult to explain how a DNN works<sup>24</sup>.  
268 It is important to highlight that this feature creation is fundamentally different from all  
269 other existing cell deconvolution algorithms, which rely on heuristics that select a  
270 defined subset of genes as features for linear regression.

271 Another advantage of this inherent feature engineering is that Scaden can be trained  
272 to be robust to input noise and bias (e.g. batch effects). Noise and bias are all prevalent  
273 in experimental data, due to different sample quality, sample processing,  
274 experimenters, and instrumentation, for example. If the network is trained on different  
275 datasets of the same tissue, however, it learns to create hidden features that are  
276 robust to noise and bias, such as batch effects. This robustness is pivotal in real world  
277 cell deconvolution use cases, where the bulk RNA data for deconvolution and the  
278 training data (and therefore the network and GEP) contain different noise and biases.  
279 While especially recent cell deconvolution algorithms include batch correction  
280 heuristics prior to GEP construction, Scaden optimizes its hidden features  
281 automatically when trained on data from various batches.

282 The robustness to noise and bias, which might be due to hidden feature generation, is  
283 especially evident in Scaden's ability to deconvolve across data types. A network

284 trained on *in silico* bulk RNA-seq data can seamlessly deconvolve microarray data of  
285 the same tissue. This is quite noteworthy, as microarray data is known to have a  
286 reduced dynamic range and several hybridization-based biases compared to RNA-  
287 seq data. In other words, Scaden can deconvolve bulk data of types it has never been  
288 trained on, even in the face of strong data type bias. This raises the possibility that  
289 Scaden trained on scRNA-seq data might reliably deconvolve other bulk omics data  
290 as well, such as proteomic and metabolomic data. This assumption is strengthened  
291 by the fact that Scaden, trained on scRNA-seq data, attains state-of-the-art  
292 performance on the deconvolution of bulk RNA-seq data, two data types with very  
293 distinct biases<sup>16</sup>.

294 As highlighted in the introduction, a drawback for many DNNs is the large amount of  
295 training data required to obtain robust performance. Here, we used scRNA-seq data  
296 to create virtually unlimited amounts of *in silico* bulk RNA-seq data of predefined type  
297 (target tissue) with known composition, across datasets. This immediately highlights  
298 Scaden's biggest limitation, the dependency on scRNA-seq data of the target tissue.  
299 In this study we have shown that Scaden, trained solely on simulated data from  
300 scRNA-seq datasets, can outperform GEP-based deconvolution algorithms. We did  
301 observe, however, that the addition of labeled RNA-seq samples to the training data  
302 did significantly improve deconvolution performance in the case of PBMC data. We  
303 therefore believe that efforts to increase the similarity between simulated training data  
304 and the target bulk RNA-seq data could increase Scaden's performance further.  
305 Mixtures of *in silico* bulk RNA-seq data and publically available RNA-seq data, of  
306 purified cell types for example, could further increase the deconvolution performance  
307 of Scaden. Furthermore, domain adaptation methods can be used to improve  
308 performance of models that are trained on data (here, scRNA-seq data) that is similar

309 to the target data (here, RNA-seq data)<sup>25</sup>. In future versions, Scaden's simple  
310 multilayer perceptron architecture could leverage domain adaptation to further  
311 stabilize and improve its cell deconvolution performance.

312 Recent cell deconvolution algorithms have used cell fraction estimates to infer cell  
313 type-specific gene expression from bulk RNA-seq data. It is straightforward to use  
314 Scaden's cell fraction estimates to infer per group<sup>3</sup> and per sample<sup>7</sup> cell type-specific  
315 gene expression using simple regression or non-negative matrix factorization,  
316 respectively. We would like to add a note of caution, however, as the error of cell  
317 fraction estimates, which can be quite significant, is propagated into the gene  
318 expression calculations and will affect any downstream statistical analysis.

319 In summary, the deconvolution performance, robustness to noise and bias, the  
320 flexibility to learn from large numbers of *in silico* datasets, across data types (scRNA-  
321 seq and RNA-seq mixtures), and potentially even tissues makes us believe that DNN-  
322 based architectures will become an algorithmic mainstay of cell type deconvolution.

323



## 324 Methods

### 325 Datasets and pre-processing

#### 326 scRNA-seq datasets

327 The following human PBMC scRNA-seq datasets were downloaded from the 10X  
328 Genomics data download page: 6k PBMCs from a Healthy Donor, 8k PBMCs from a  
329 Healthy Donor, Frozen PBMCs (Donor A), Frozen PBMCs (Donor C){Zheng et al,  
330 2017}. Throughout this paper, these datasets are referred to with the handles data6k,  
331 data8k, donorA and donorC, respectively. These four datasets were chosen because  
332 of clearly identifiable cell types for the majority of cells. The Ascites scRNA-seq dataset  
333 was downloaded from <https://figshare.com> as provided by Schelker<sup>21</sup>. Pancreas and  
334 mouse brain datasets were downloaded from the scRNA-seq dataset collection of the  
335 Hemberg lab (<https://hemberg-lab.github.io/scRNA.seq.datasets/>). A table listing all  
336 datasets including references to the original publications can be found in Table S1.

#### 337 scRNA-seq preprocessing and analysis

338 All datasets were processed using the Python package Scanpy (v. 1.2.2)<sup>26</sup> following  
339 the Scanpy's reimplementation of the popular Seurat's clustering workflow. First, the  
340 corresponding cell-gene matrices were filtered for cells with less than 500 detected  
341 genes, and genes expressed in less than 5 cells. The resulting count matrix for each  
342 dataset was filtered for outliers with high or low numbers of counts. Gene expression  
343 was normalized to library size using the Scanpy function 'normalize\_per\_cell'. The  
344 normalized matrix of all filtered cells and genes was saved for the subsequent data  
345 generation step.

346 The following processing and analysis steps had the sole purpose of assigning cell  
347 type labels to every cell. All cells were clustered using the louvain clustering  
348 implementation of the Scanpy package. The louvain clustering resolution was chosen  
349 for each dataset, using the lowest possible resolution value (low resolution values lead  
350 to less clusters) for which the calculated clusters separated the cell types  
351 appropriately. The top 1000 highly variable genes were used for clustering, which were  
352 calculated using Scanpy's 'filter\_genes\_dispersion' function with parameters  
353 min\_mean=0.0125, max\_mean=3 and min\_disp=0.5. Principal Component Analysis  
354 (PCA) was used for dimensionality reduction.

355 To identify cell types, marker genes were investigated for all cell types in question. For  
356 PBMC datasets, useful marker genes were adopted from public resources such as the  
357 Seurat tutorial for 2700 PBMCs<sup>27</sup>. Briefly, IL7R was taken as marker for CD4 T-cells,  
358 LYZ for Monocytes, MS4A1 for B-cells, GNLY for Natural Killer cells, FCER1A for  
359 Dendritic cells and CD8A and CCL5 as markers for CD8 T-cells. For all other scRNA-  
360 seq datasets, marker genes and expected cell types were inferred from the original  
361 publication of the dataset. For instance, to annotate cell types of the mouse brain  
362 dataset from Zeisel et al.<sup>28</sup>, we used the same marker genes as Zeisel and colleagues.  
363 We did not use the same cell type labels from the original publications because a main  
364 objective was to assure that cell type labeling is consistent between all datasets of a  
365 certain tissue.

366 Cell type annotation was performed manually across all the clusters for each dataset,  
367 such that all cells belonging to the same cluster were labeled with the same cell type.  
368 The cell type identity of each cluster was chosen by crossing the cluster's highly  
369 differentially expressed genes with the curated cell type's marker genes. Clusters that

370 could not be clearly identified with a cell type were grouped into the ‘Unknown’  
371 category.

## 372 Tissue Datasets for Benchmarking

373 To assess the deconvolution performance on real tissue expression data, we used  
374 datasets for which the corresponding cell fractions were measured and published. The  
375 first dataset is the **PBMC1** dataset which was obtained from Zimmermann *et al.*<sup>20</sup>. The  
376 second dataset, **PBMC2**, was downloaded from GEO with accession code  
377 GSE107011<sup>10</sup>. This dataset contains both RNA-seq profiles of immune cells (S4  
378 cohort) and from bulk individuals (S13 cohort). As we were interested in the bulk  
379 profiles, we only used 12 samples from the S13 cohort from this data. Flow cytometry  
380 fractions were collected from the Monaco *et al.* publication<sup>10</sup>.

381 In addition to the above mentioned two PBMC datasets, we used Ascites RNA-seq  
382 data. This dataset was kindly provided by the authors and cell type fractions for this  
383 dataset were taken from the supplementary materials of the publication<sup>21</sup>.

384 For the evaluation on pancreas data, artificial bulk RNA-seq samples created from the  
385 scRNA-seq dataset of Xin *et al.*<sup>18</sup> were used. This dataset was downloaded from the  
386 resources of the MuSiC publication<sup>8</sup>. The artificial bulk RNA-seq samples used for  
387 evaluation were then created using the ‘bulk\_construct’ function of the MuSiC tool.

388 To assess how Scaden deals with unknown cell types in a bulk mixture, we used the  
389 whole blood dataset from Newman *et al.*<sup>7</sup>, which consists of 12 samples (GSE127813).

390 Cell type fractions were downloaded from the CSx website  
391 (<https://cibersortx.stanford.edu/download.php>).

392 To assess robustness against unknown mixture content, all cells classified as  
393 ‘Unknown’ were removed from the data6k, data8k, donorA, and donorC datasets to  
394 generate training samples for Scaden and reference datasets for MuSiC and CSx.

395 Then, test datasets were generated with fixed content of ‘Unknown’ cells at 5%, 10%,  
396 20% and 30%. Performance on these samples was then assessed to test robustness  
397 against unseen cell types in the bulk mixture. Scaden was trained on samples from all  
398 datasets but the test dataset, while CSx and MuSiC used data8k as a reference.

399 The microarray dataset GSE65133 was downloaded from GEO, and cell type fractions  
400 taken from the original CS publication<sup>6</sup>.

401 Finally, we wanted to get insights into neurodegenerative cell fraction changes in the  
402 brain. While it is known that neurodegenerative diseases like Alzheimer’s Disease are  
403 accompanied by a gradual loss of brain neurons, stage-specific cell type shifts are still  
404 hard to come by. Here we use the ROSMAP (Religious Orders Study and Memory and  
405 Aging Project Study) cortical RNA-seq dataset along with the corresponding clinical  
406 metadata, to infer cell type composition over six clinically relevant stages of  
407 neurodegeneration<sup>22</sup>.

#### 408 RNA-seq preprocessing and analysis

409 For the RNA-seq datasets analyzed in this study, we did not apply any additional  
410 processing steps, but used the obtained count or expression tables directly as  
411 downloaded for all dataset except the ROSMAP dataset. For the latter, we generated  
412 count tables from raw FastQ-files using Salmon<sup>29</sup> and the GRCh38 reference genome.  
413 FastQ-files from the ROSMAP study were downloaded from Synapse  
414 ([www.synapse.org](http://www.synapse.org)).

#### 415 Simulation of bulk RNA-seq samples from scRNA-seq data

416 Scaden’s deep neural network requires large amounts of training RNA-seq samples  
417 with known cell fractions. This explains why the generation of artificial bulk RNA-seq  
418 data is one of the key elements of the Scaden workflow.

419 In order to generate the training data, preprocessed scRNA-seq datasets were used  
420 (see section ‘Data Collection and Processing’), comprising the gene expression matrix  
421 and the cell type labels. Artificial RNA-seq samples were simulated by sub-sampling  
422 cells from individual scRNA-seq datasets - cells from different datasets were not  
423 merged into samples to preserve within-subject relationships. Datasets generated  
424 from multiple subjects were split according to subject and each sub-sampling was  
425 constrained to cells from one subject in order to capture the cross-subject  
426 heterogeneity and keep subject-specific gene dependencies.

427 The exact sub-sampling procedure is described in the following. First, for every  
428 simulated sample, random fractions were created for all different cell types within each  
429 scRNA-seq dataset using the random module of the Python package NumPy. Briefly,  
430 a random number was chosen from a uniform distribution between 0 and 1 using the  
431 NumPy function ‘random.rand()’ for each cell type, and then this number was divided  
432 by the sum of all random numbers created to ensure the constraint of all fractions  
433 adding up to 1:

$$434 \quad f_c = \frac{r_c}{\sum_{C_{all}} r_c}$$

435 where  $r_c$  is the random number created for cell type  $c$ , and  $C_{all}$  is the set of all cell  
436 types. Here,  $f_c$  is the calculated random fraction for cell type  $c$ . Then, each fraction  
437 was multiplied with the total number of cells selected for each sample, yielding the  
438 number of cells to choose for a specific cell type:

$$439 \quad N_c = f_c * N_{total}$$

440  
441 where  $N_c$  is the number of cells to select for the cell type  $c$ , and  $N_{total}$  is the total  
442 number of cells contributing to one simulated RNA-seq sample (400, in this study).  
443  
444 Next,  $N_c$  cells were randomly sampled from the scRNA-seq gene expression matrix

445 for each cell type  $c$ . Afterwards, the randomly selected single-cell expression profiles  
446 for every cell type are then aggregated by summing their expression values, to yield  
447 the artificial bulk expression profile for this sample.

448 Using the above described approach, cell compositions that are strongly biased  
449 toward a certain cell type or are missing specific cell types are rare among the  
450 generated training samples. To account for this and to simulate cell compositions with  
451 a heavy bias to and the absence of certain cell types, a variation of the sub-sampling  
452 procedure was used to generate samples with sparse compositions, which we refer to  
453 as sparse samples. Before generating the random fractions for all cell types, a random  
454 number of cell types was selected to be absent from the sample, with the requirement  
455 of at least one cell type constituting the sample. After these leave-out cell types were  
456 chosen, random fractions were created and samples generated as described above.

457 Using this procedure, we generated 32,000 samples for the human PBMC training  
458 dataset, 14,000 samples for the human pancreas training dataset and 30,000 samples  
459 for the mouse brain training dataset (Table S2).

460 Artificial bulk RNA-seq datasets were stored in 'h5ad' format using the Anndata  
461 package<sup>26</sup>, which allows to store the samples together with their corresponding cell  
462 type ratios, while also keeping information about the scRNA-seq dataset of origin for  
463 each sample. This allowed to access samples from specific datasets, which is useful  
464 for cross validation.

## 465 Scaden Overview

466 The following section contains an overview of the input data preprocessing, the  
467 Scaden model, model selection, and how Scaden predictions are generated.

## 468 Input Data Preprocessing

469 The data preprocessing step is aimed to make the input data more suitable for  
470 machine learning algorithms. To achieve this, an optimal preprocessing procedure  
471 should transform any input data from the simulated samples or from the bulk RNA-seq  
472 to the same feature scale. Before any scaling procedure can be applied, it must be  
473 ensured that both the training data and the bulk RNA-seq data subject to prediction  
474 share the same features. Therefore, before scaling, both datasets are limited to  
475 contain features (genes) that are available in both datasets.. The two-step processing  
476 procedure used for Scaden is described in the following:

477 First, to account for heteroscedasticity, a feature inherent to RNA-seq data, the data  
478 was transformed into logarithmic space by adding a pseudocount of 1 and then taking  
479 the Logarithm (base 2). Additional to stabilizing the variance, this transformation yields  
480 data that is approximately Gaussian.

481 Second, every sample was scaled to the range [0,1] using the `MinMaxScaler()` class  
482 from the Sklearn preprocessing module. Per sample scaling, unlike per feature scaling  
483 that is more common in machine learning, assures that inter-gene relative expression  
484 patterns in every sample are preserved. This is important, as our hypothesis was that  
485 a neural network could learn the deconvolution from these inter-gene expression  
486 patterns.

$$487 \quad x_{scaled,i} = (x_i - \min(X_i)) / (\max(X_i) - \min(X_i))$$

488 where  $x_{scaled,i}$  is the log2 expression value of gene x in sample i,  $X_i$  is the vector of  
489 log2 expression values for all genes of sample i,  $\min(X_i)$  is the minimum gene  
490 expression of vector  $X_i$ , and  $\max(X_i)$  the maximum gene expression of vector  $X_i$ .

491 Note that all training datasets are stored as expression values and are only processed  
492 as described above. In the deployment use-case the simulated training data should  
493 contain the same features as in the bulk RNA-seq sample that shall be deconvolved.

#### 494 Model Selection

495 The goal of model selection was to find an architecture and hyperparameters that  
496 robustly deconvolve simulated tissue RNA-seq data and, more importantly, real bulk  
497 RNA-seq data. Due to the very limited availability of bulk RNA-seq datasets with known  
498 cell fractions, model selection was mainly optimized on the simulated PBMC datasets.  
499 To capture inter-experimental variation, we used leave-one-dataset-out cross  
500 validation for model optimization: a model was trained on simulated data from all but  
501 one dataset, and performance was tested on simulated samples from the left-out  
502 dataset. This allows to simulate batch effects between datasets and helps to test the  
503 generalizability of the model. Model performance was evaluated based on pearson  
504 product moment correlation and absolute deviation between predicted and ground  
505 truth values. As averaging the predictions of models with different architectures  
506 increased performance, we decided to use an ensemble architecture for Scaden. For  
507 this ensemble, the three best performing architectures were chosen. Model training  
508 and prediction is done separately for each model, with the prediction averaging step  
509 combining all model predictions (Fig. S1). We provide a list of all tested parameters in  
510 the supplementary materials (Table S4).

#### 511 Final Scaden Model

512 The Scaden model learns cell type deconvolution through supervised training on  
513 datasets of simulated bulk RNA-seq samples simulated with scRNA-seq data. To  
514 account for model biases and to improve performance, Scaden consists of an



515 ensemble of three deep neural networks with varying architectures and degrees of  
516 dropout regularization. All models of the ensemble use four layers of varying sizes  
517 between 32 and 1024 nodes, with dropout-regularization implemented in two of the  
518 three ensemble models. The exact layer sizes and dropout rates are listed in Table  
519 S3. The Rectified Linear Unit (ReLU) is used as activation function in every internal  
520 layer. We used a Softmax function to predict cell fractions, as we did not see any  
521 improvements in using a linear output function with consecutive non-negativity  
522 correction and sum-to-one scaling. Python (v. 3.6.6) and the TensorFlow library (v.  
523 1.10.0) were used for implementation of Scaden. A complete list of all software used  
524 for the implementation of Scaden is provided in Table S12.

## 525 Training and Prediction

526 After the preprocessing of the data a Scaden ensemble can be trained on simulated  
527 tissue RNA-seq data or mixtures of simulated and real tissue RNA-seq data.  
528 Parameters are optimized using Adam with a learning rate of 0.0001 and a batch size  
529 of 128. We used an L1 loss as optimization objective:

$$530 \quad L1(y_i, \hat{y}_i) = |y_i - \hat{y}_i|$$

531 where  $y_i$  is the vector of ground truth fractions of sample  $i$  and  $\hat{y}_i$  is the vector of  
532 predicted fractions of sample  $i$ . Each of the three ensemble models is trained  
533 independently for 5,000 steps. This 'early stopping' serves to avoid domain overfitting  
534 on the simulated tissue data, which would decrease the model performance on the  
535 real tissue RNA-seq data. We observed that training for more steps lead to an average  
536 performance decrease on real tissue RNA-seq data. To perform deconvolution with  
537 Scaden, a bulk RNA-seq sample is fed into a trained Scaden ensemble and three  
538 independent predictions for the cell type fractions of this sample are generated by the

539 trained deep neural networks. These three predictions are then averaged per cell type  
540 to yield the final cell type composition for the input bulk RNA-seq sample:

$$541 \quad \hat{y}_c = \frac{\hat{y}_c^1 + \hat{y}_c^2 + \hat{y}_c^3}{3}$$

542 where  $\hat{y}_c$  is the final predicted fraction for cell type  $c$  and  $\hat{y}_c^i$  is the predicted fraction for  
543 cell type  $c$  of model  $i$ .

## 544 Algorithm Comparison

545 We used several performance measures to compare Scaden to four existing cell  
546 deconvolution algorithms, CIBERSORT with LM22 GEP (CS), CIBERSORTx (CSx),  
547 MuSiC and CPM. To compare the performance of the five deconvolution algorithms  
548 we measured the root mean squared error (RMSE), Lin's concordance correlation  
549 coefficient  $CCC$ , Pearson product moment correlation coefficient  $r$ , and  $R^2$  values  
550 comparing real and predicted cell fractions estimates. Additionally, to identify  
551 systematic prediction errors and biases, slope and intercept for the regression lines  
552 were calculated. These metrics are defined as follows:

$$553 \quad RMSE(y, \hat{y}) = \sqrt{avg(y - \hat{y})^2}$$

$$554 \quad r(y, \hat{y}) = \frac{cov(y, \hat{y})}{\sigma_y \sigma_{\hat{y}}}$$

$$555 \quad R^2(y, \hat{y}) = r(y, \hat{y})^2$$

$$556 \quad slope(y, \hat{y}) = \frac{\Delta y}{\Delta \hat{y}}$$

$$557 \quad CCC(y, \hat{y}) = \frac{2r\sigma_y\sigma_{\hat{y}}}{\sigma_y^2 + \sigma_{\hat{y}}^2 + (\mu_x - \mu_{\hat{y}})}$$

558 where  $y$  are the ground truth fractions,  $\hat{y}$  are the prediction fractions,  $\sigma_x$  is the standard  
559 deviation of  $x$ ,  $cov(y, \hat{y})$  is the covariance of  $y$  and  $\hat{y}$ , and  $\mu_y, \mu_{\hat{y}}$  are the mean of the  
560 predicted and ground truth fractions, respectively.

561 All metrics were calculated for all data points of a dataset, and separately for all data  
562 points of a specific cell type. For the latter approach, we then averaged the resulting  
563 values to recover single values. While in general the metrics calculated on all data  
564 points are sufficient, good performance on cell type-level is important if one is to  
565 compare fractions of a specific cell type between samples.

#### 566 CIBERSORT (CS)

567 CS is a cell convolution algorithm based on specialized GEPs and support vector  
568 regression. Cell composition estimations were obtained using the CS web application  
569 (<https://cibersort.stanford.edu/>). For all deconvolutions with CS, we used the LM22  
570 GEP, which was generated by the CS authors from 22 leukocyte subsets profiled on  
571 the HGU133A microarray platform.

572 Because the LM22 GEP matrix contains cell types at a finer granularity than what was  
573 used for this study, predicted fractions of sub-cell types were added together. For cell  
574 grouping, we used the mapping of sub-cell types to broader types given by Figure 6  
575 from Monaco *et al.*<sup>10</sup>. We provide a table with the exact mappings used here in the  
576 supplementary material (Table S13). The deconvolution was performed using 500  
577 permutations with quantile normalization disabled for all datasets but GSE65133  
578 (Microarray), as is recommended for RNA-seq data. We used default settings for all  
579 other CS parameters.

#### 580 CIBERSORTx (CSx)

581 CSx is a recent variant of CS that can generate GEP matrices from scRNA-seq data  
582 and use these for deconvolution. For additional deconvolution robustness, it applies  
583 batch normalization to the data. All signature matrices were created by uploading the  
584 labeled scRNA-seq expression matrices and using the default options. Quantile

585 normalization was disabled. For deconvolution on simulated data, no batch  
586 normalization was used. For all bulk RNA-seq datasets, the S-Mode batch  
587 normalization was chosen. All PBMC datasets were deconvolved using a GEP matrix  
588 generated from the data6k dataset (for simulated samples from data6k, a donorA GEP  
589 matrix was chosen).

## 590 MuSiC

591 MuSiC is a deconvolution algorithm that uses multi-subject scRNA-seq datasets as  
592 GEP matrices in an attempt to include heterogeneity in the matrices to improve  
593 generalization. While MuSiC tries to address similar issues of previous deconvolution  
594 algorithms by using scRNA-seq data, the approach is very different. For  
595 deconvolution, MuSiC applies a sophisticated GEP-based deconvolution algorithm  
596 that uses weighted non-negative least squares regression with an iterative estimation  
597 procedure that imposes more weight on informative genes and less weight on non-  
598 informative genes.

599 The MuSiC R package contains functionality to generate the necessary GEP matrix  
600 given a scRNA-seq dataset and cell type labels. To generate MuSiC deconvolution  
601 predictions on PBMC datasets, we used the data8k scRNA-seq dataset as reference  
602 data for MuSiC and follow the tutorial provided by the authors to perform the  
603 deconvolution. For deconvolution of artificial samples generated from the data8k  
604 dataset, we provided MuSiC with the data6k dataset as reference instead.

605 MuSiC was developed with a focus on multi-subject scRNA-seq datasets, in which the  
606 algorithm tries to take advantage from the added heterogeneity that these datasets  
607 contain, by calculating a measure of cross-subject consistency for marker genes. To  
608 assess how Scaden performs on multi-subject datasets compared to MuSiC, we  
609 evaluated both methods on artificial bulk RNA-seq samples from human pancreas. We

610 used the 'bulk\_construct' function from MuSiC to combine the cells from all 18 subjects  
611 contained in the scRNA-seq dataset from Xin et al to generate artificial bulk samples  
612 for evaluation. Next, as a multi-subject reference dataset, we used the pancreas  
613 scRNA-seq dataset from Segerstolpe *et al.*<sup>19</sup>, which contains single-cell expression  
614 data from 10 different subjects, 4 of which with type-2 Diabetes. For Scaden, the  
615 Segerstolpe scRNA-seq dataset was split by subjects, and training datasets were  
616 generated for each subject, yielding in total 10,000 samples. For MuSiC, a processed  
617 version of this dataset was downloaded from the resources provided by the MuSiC  
618 authors<sup>8</sup> and used as input reference dataset for the MuSiC deconvolution.  
619 Deconvolution was then performed according to the MuSiC tutorial, and performance  
620 compared according to the above-defined metrics.

#### 621 Cell Population Mapping (CPM)

622 CPM is a deconvolution algorithm that uses single-cell expression profiles to identify  
623 a so-called 'cell population map' from bulk RNA-seq data<sup>9</sup>. In CPM, the cell population  
624 map is defined as composition of cells over a cell-state space, where a cell-state is  
625 defined as a current phenotype of a single cell. Contrary to other deconvolution  
626 methods, CPM tries to estimate the abundance of all cell-states and types for a given  
627 bulk mixture, instead of only deconvolving the cell types. As input, CPM requires a  
628 scRNA-seq dataset and a low-dimensional embedding of all cells in this dataset, which  
629 represents the cell-state map. As CPM estimates abundances of both cell-states and  
630 types, it can be used for cell type deconvolution by summing up all estimated fractions  
631 for all cell-states of a given cell type - a method that is implemented in the scBio R  
632 package, which contains the CPM method. To perform deconvolution with CPM, we  
633 used the data6k PBMC scRNA-seq dataset as input reference for all PBMC samples.  
634 For samples simulated from the data6k dataset, we used the data8k dataset as

635 reference. According to the CPM paper, a dimension reduction method can be used  
636 to obtain the cell-state space. We therefore used UMAP, a dimension reduction  
637 method widely used for scRNA-seq data, to generate the cell-state space mapping for  
638 the input scRNA-seq data. Deconvolution was then performed using the CPM function  
639 of the scBio package with a scRNA-seq and accompanying UMAP embedding as  
640 input.

641

## 642 **Data Availability**

643 Only publicly available datasets were used during this study. The scRNA-seq PBMC  
644 datasetse donorA, donorC, data6k and data8k were all downloaded from 10X  
645 Genomics (<https://support.10xgenomics.com/single-cell-gene-expression/datasets>),  
646 were they are listed as 'Frozen PBMCs (Donor A)', 'Frozen PBMCs (Donor C)', '6k  
647 PBMCs from a Healthy Donor' and '8k PBMCs from a Healthy Donor', respectively.  
648 The Segerstolpe et al. scRNA-seq pancreas dataset was downloaded from  
649 ArrayExpress with accession code E-MTAB-5061. The scRNA-seq datasets from  
650 Baron et al. (pancreas), Tasic et al., Zeisel et al., Romanov et al., Campbell et al.  
651 and Chen et al. (all mouse brain) were all downloaded from [https://hemberg-](https://hemberg-lab.github.io/scRNA.seq.datasets/)  
652 [lab.github.io/scRNA.seq.datasets/](https://hemberg-lab.github.io/scRNA.seq.datasets/). The ascites scRNA-seq dataset was downloaded  
653 from <https://figshare.com/s/711d3fb2bd3288c8483a>. The bulk RNA-seq dataset  
654 PBMC1 is accessible from ImmPort with accession code SDY67. The PBMC2  
655 dataset was downloaded from GEO with accession code GSE107011. The  
656 ROSMAP human brain RNA-seq dataset was downloaded from Synapse (ID:  
657 syn3219045). The bulk RNA-seq data from ascites was kindly provided by Schelker  
658 et al. The pancreas scRNA-seq dataset from Xin et al. was accessed from the  
659 MuSiC tutorial site (<https://xuranw.github.io/MuSiC/articles/pages/data.html>).

## 660 Code Availability

661 The source code for Scaden is available at <https://github.com/KevinMenden/scaden>.

662 Documentation is published at <https://scaden.readthedocs.io>. Code to generate the

663 figures along with the training datasets used in this study is published at figshare:

664 <https://figshare.com/projects/Scaden/62834>.

665



## 666 List of abbreviations

667 RNA-seq : Next Generation RNA Sequencing

668 GEP : gene expression profile matrix

669 SVR : Support Vector Regression

670 DNN : Deep Neural Network

671 scRNA-seq : single cell RNA-seq

672 simulated tissue : training data generated by mixing proportions of scRNA-seq data

673 PBMC : peripheral blood mononuclear cells

674 CCC : concordance correlation coefficient

675  $r$  : Pearson's correlation coefficient

676 CS : CIBERSORT

677 CSx : CIBERSORTx

678 CPM : Cell Population Mapping

## 679 **Author information**

### 680 **Affiliations**

#### 681 **German Center for Neurodegenerative Diseases Tuebingen, Germany**

682 Kevin Menden, Anupriya Dalmia, Peter Heutink, Stefan Bonn

#### 683 **Institute of Medical Systems Biology, University Medical Center Hamburg-**

#### 684 **Eppendorf, Germany**

685 Mohamed Marouf, Stefan Bonn

### 686 **Contributions**

687 KM and SB initiated the project. KM, PH, and SB designed the study, deep learning  
688 models, and analysis. KM and MM built the deep learning models. KM, MM, and AD  
689 analyzed the data. KM and SB wrote and MM, AD, and PH contributed to the  
690 manuscript writing.

691

### 692 **Competing interests**

693 The authors have no competing interests.

### 694 **Acknowledgements**

695 We would like to thank the people of the Genome Biology of Neurodegenerative  
696 Diseases group and Institute of Medical Systems Biology for helpful discussions and  
697 suggestions.

### 698 **Funding**

699 This study was supported in part by RiMod-FTD a EU Joint Programme -  
700 Neurodegenerative Disease Research (JPND) to PH, KM and SFB 1286/Z2 and  
701 BMBF Integrative Data Semantics for Neurodegenerative research (IDSN) to MM.

702 **Corresponding author**

703 Correspondence to Stefan Bonn (sbonn@uke.de) and Kevin Menden  
704 (kevin.menden@dzne.de).

705

## 706 References

- 707 1. Hrdlickova, R., Toloue, M. & Tian, B. RNA-Seq methods for transcriptome  
708 analysis. *Wiley Interdiscip. Rev. RNA* **8**, (2017).
- 709 2. Egeblad, M., Nakasone, E. S. & Werb, Z. Tumors as organs: Complex tissues  
710 that interface with the entire organism. *Dev. Cell* **18**, 884–901 (2010).
- 711 3. Kuhn, A., Thu, D., Waldvogel, H. J., Faull, R. L. M. & Luthi-Carter, R.  
712 Population-specific expression analysis (PSEA) reveals molecular changes in  
713 diseased brain. *Nat. Methods* **8**, 945–947 (2011).
- 714 4. Avila Cobos, F., Vandesompele, J., Mestdagh, P. & De Preter, K.  
715 Computational deconvolution of transcriptomics data from mixed cell  
716 populations. *Bioinformatics* **34**, 1969–1979 (2018).
- 717 5. Mohammadi, S., Zuckerman, N., Goldsmith, A. & Grama, A. A Critical Survey  
718 of Deconvolution Methods for Separating Cell Types in Complex Tissues.  
719 *Proc. IEEE* **105**, 340–366 (2017).
- 720 6. Newman, A. M. *et al.* Robust enumeration of cell subsets from tissue  
721 expression profiles. *Nat. Methods* **12**, 453–457 (2015).
- 722 7. Newman, A. M. *et al.* Determining cell type abundance and expression from  
723 bulk tissues with digital cytometry. *Nat. Biotechnol.* (2019).  
724 doi:10.1038/s41587-019-0114-2
- 725 8. Wang, X., Park, J., Susztak, K., Zhang, N. R. & Li, M. Bulk tissue cell type  
726 deconvolution with multi-subject single-cell expression reference. *Nat.*  
727 *Commun.* **10**, 380 (2019).
- 728 9. Frishberg, A. *et al.* Cell composition analysis of bulk genomics using single-cell  
729 data. *Nat. Methods* **16**, (2019).
- 730 10. Monaco, G. *et al.* RNA-Seq Signatures Normalized by mRNA Abundance

- 731 Allow Absolute Deconvolution of Human Immune Cell Types. *Cell Rep.* **26**,  
732 1627–1640.e7 (2019).
- 733 11. Vallania, F. *et al.* Leveraging heterogeneity across multiple datasets increases  
734 cell-mixture deconvolution accuracy and reduces biological and technical  
735 biases. *Nat. Commun.* **9**, (2018).
- 736 12. Venet, D., Pecasse, F., Maenhaut, C. & Bersini, H. Separation of samples into  
737 their constituents using gene expression data. *Bioinformatics* **17**, 279–287  
738 (2001).
- 739 13. Shapiro, E., Biezuner, T. & Linnarsson, S. Single-cell sequencing-based  
740 technologies will revolutionize whole-organism science. *Nat. Rev. Genet.* **14**,  
741 618–630 (2013).
- 742 14. Schaum, N. *et al.* Single-cell transcriptomics of 20 mouse organs creates a  
743 Tabula Muris. *Nature* **562**, 367–372 (2018).
- 744 15. Kelley, K. W., Nakao-Inoue, H., Molofsky, A. V. & Oldham, M. C. Variation  
745 among intact tissue samples reveals the core transcriptional features of human  
746 CNS cell classes. *Nat. Neurosci.* **21**, 1171–1184 (2018).
- 747 16. Hicks, S. C., Townes, F. W., Teng, M. & Irizarry, R. A. Missing data and  
748 technical variability in single-cell RNA-sequencing experiments. *Biostatistics*  
749 **19**, 562–578 (2018).
- 750 17. Lin, L. I. A Concordance Correlation Coefficient to Evaluate Reproducibility  
751 Author ( s ): Lawrence I-Kuei Lin Published by : International Biometric Society  
752 Stable URL : <http://www.jstor.org/stable/2532051> REFERENCES Linked  
753 references are available on JSTOR for thi. *Biometrics* **45**, 255–268 (1989).
- 754 18. Xin, Y. *et al.* RNA Sequencing of Single Human Islet Cells Reveals Type 2  
755 Diabetes Genes. *Cell Metab.* **24**, 608–615 (2016).

- 756 19. Segerstolpe, Å. *et al.* Single-Cell Transcriptome Profiling of Human Pancreatic  
757 Islets in Health and Type 2 Diabetes. *Cell Metab.* **24**, 593–607 (2016).
- 758 20. Zimmermann, M. T. *et al.* System-wide associations between DNA-  
759 methylation, gene expression, and humoral immune response to influenza  
760 vaccination. *PLoS One* **11**, 1–21 (2016).
- 761 21. Schelker, M. *et al.* Estimation of immune cell content in tumour tissue using  
762 single-cell RNA-seq data. *Nat. Commun.* **8**, 2032 (2017).
- 763 22. Bennett, D. A. *et al.* Religious Orders Study and Rush Memory and Aging  
764 Project. *J. Alzheimer's Dis.* **64**, S161–S189 (2018).
- 765 23. Braak, H. & Braak, E. Neuropathological staging of Alzheimer-related  
766 changes. *Acta Neuropathol.* **82**, 239–59 (1991).
- 767 24. Yosinski, J., Clune, J., Nguyen, A., Fuchs, T. & Lipson, H. Understanding  
768 Neural Networks Through Deep Visualization. (2015).
- 769 25. Athiwaratkun, B., Finzi, M., Izmailov, P. & Wilson, A. G. Improving  
770 Consistency-Based Semi-Supervised Learning with Weight Averaging. *Jmlr*  
771 **17**, 1–35 (2018).
- 772 26. Wolf, F. A., Angerer, P. & Theis, F. J. SCANPY: Large-scale single-cell gene  
773 expression data analysis. *Genome Biol.* **19**, 1–5 (2018).
- 774 27. Satija, R., Farrell, J. A., Gennert, D., Schier, A. F. & Regev, A. Spatial  
775 reconstruction of single-cell gene expression data. *Nat. Biotechnol.* **33**, 495–  
776 502 (2015).
- 777 28. Zeisel, A. *et al.* Molecular Architecture of the Mouse Nervous System. *Cell*  
778 **174**, 999–1014.e22 (2018).
- 779 29. Love, M. I., Soneson, C., Patro, R., Vitting-seerup, K. & Oshlack, A. Swimming  
780 downstream : statistical analysis of differential transcript usage following

781 Salmon quantification. 1–50 (2019).

782

783

## 784 Supplementary Figures & Tables

| Tissue      | Name        | # cells | # Subjects | Source                                |
|-------------|-------------|---------|------------|---------------------------------------|
| PBMC        | data6k      | 5,419   | 1          | 10X Genomics                          |
| PBMC        | data8k      | 8,381   | 1          | 10X Genomics                          |
| PBMC        | donorA      | 2,900   | 1          | 10X Genomics                          |
| PBMC        | donorC      | 9,519   | 1          | 10X Genomics                          |
| Mouse Brain | Tasic       | 1,679   | 1          | Tasic et al., Nat. Neurosci., 2016    |
| Mouse Brain | Zeisel      | 3,005   | 1          | Zeisel et al., Science, 2015          |
| Mouse Brain | Romanov     | 2,881   | 1          | Romanov et al., Nat. Neurosci., 2018  |
| Mouse Brain | Campbell    | 21,086  | 1          | Campbell et al, Nat. Neurosci., 2017  |
| Mouse Brain | Chen        | 14,437  | 1          | Chen et al., Cell Rep., 2017          |
| Pancreas    | Segerstolpe | 3,514   | 10         | Segerstolpe et al., Cell Metab., 2016 |
| Pancreas    | Baron       | 8,569   | 4          | Baron et al., Cell Syst., 2016        |
| Ascites     | Ascites     | 3,114   | 3          | Schelker et al, Nat. Comm., 2018      |

785 **Table S1** *scRNA-seq datasets used for the generation of simulated tissues for Scaden*  
786 *training.*

787



788

| Tissue      | # Samples | # Datasets | Size    |
|-------------|-----------|------------|---------|
| PBMC        | 32,000    | 4          | 1.2 GB  |
| Pancreas    | 14,000    | 2          | 0.6 GB  |
| Mouse Brain | 30,000    | 5          | 1.5 GB  |
| Ascites     | 6,000     | 1          | 0.38 GB |

789 **Table S2** *Number of samples, datasets, and size of the simulated training data.*

790

791

| Parameter     | Values tested                         |
|---------------|---------------------------------------|
| Batch size    | 32, 64, 128, 256, 512                 |
| # Layers      | 2, 3, 4                               |
| Layer sizes   | 2048, 1024, 512, 256, 128, 64, 32, 16 |
| Dropout rate  | [0, 0.8]                              |
| Loss function | L1, L2                                |

792 **Table S3** *Hyperparameters used for model optimization.*

793

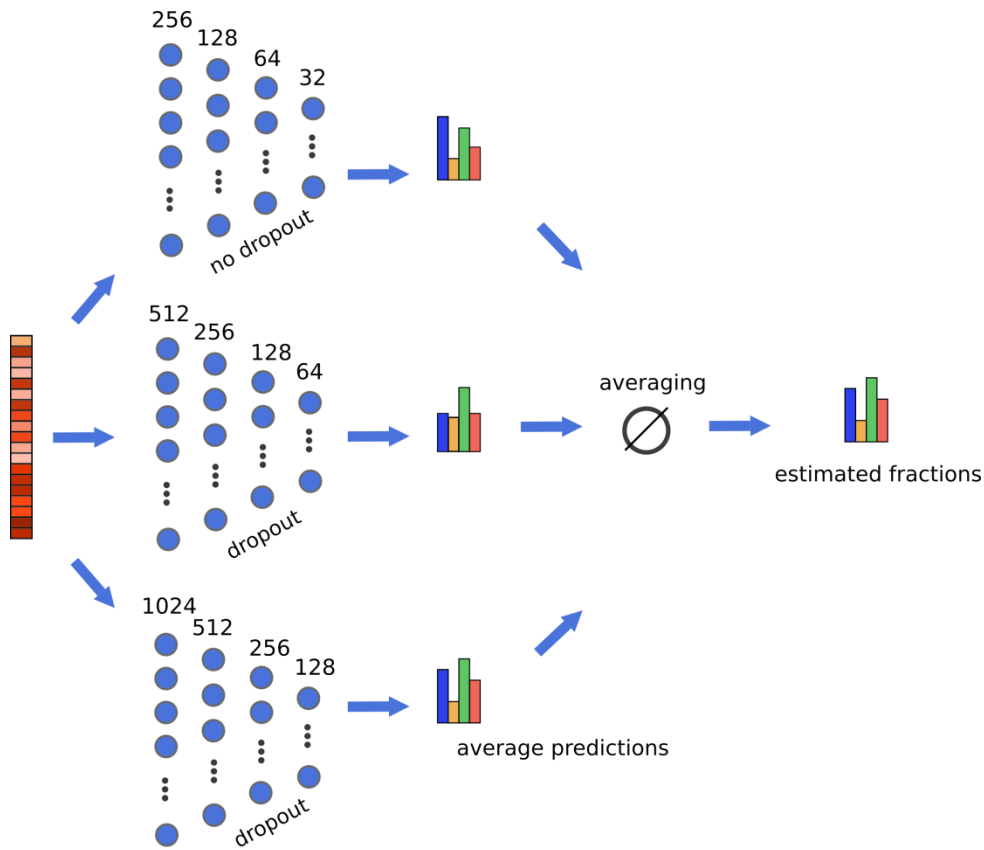

794

795 **Figure S1** Overview of the Scaden neural network ensemble model. A bulk RNA-seq  
796 sample is the input to three separate deep neural networks with varying layer sizes  
797 and dropout regularization. The predictions of all three models are subsequently  
798 averaged to obtain the final Scaden predictions. During training, predictions are not  
799 averaged and each model is trained separately.

800

| Model | # Layers | Layer sizes         | Dropout rates     |
|-------|----------|---------------------|-------------------|
| M256  | 4        | 256, 128, 64, 32    | 0, 0, 0, 0        |
| M512  | 4        | 512, 256, 128, 64   | 0, 0.3, 0.2., 0.1 |
| M1024 | 4        | 1024, 512, 256, 128 | 0, 0.6, 0.3, 0.1  |

801 **Table S4** Architectures of deep neural network models used in Scaden ensemble.

802

| Method        | DS     | RMSE  | Slope  | Correlation | Intercept | CCC    |
|---------------|--------|-------|--------|-------------|-----------|--------|
| <b>CPM</b>    | data6k | 0.192 | 0.03   | 0.082       | 0.162     | 0.053  |
| <b>CPM</b>    | data8k | 0.185 | 0.048  | 0.263       | 0.159     | 0.093  |
| <b>CPM</b>    | donorA | 0.239 | -0.081 | -0.259      | 0.18      | -0.147 |
| <b>CPM</b>    | donorC | 0.189 | 0.038  | 0.102       | 0.16      | 0.066  |
| <b>CS</b>     | data6k | 0.163 | 0.508  | 0.57        | 0.082     | 0.566  |
| <b>CS</b>     | data8k | 0.136 | 0.551  | 0.708       | 0.075     | 0.687  |
| <b>CS</b>     | donorA | 0.137 | 0.605  | 0.767       | 0.066     | 0.746  |
| <b>CS</b>     | donorC | 0.168 | 0.45   | 0.522       | 0.092     | 0.517  |
| <b>CSx</b>    | data6k | 0.106 | 0.756  | 0.824       | 0.041     | 0.821  |
| <b>CSx</b>    | data8k | 0.097 | 0.744  | 0.863       | 0.043     | 0.854  |
| <b>CSx</b>    | donorA | 0.125 | 0.696  | 0.81        | 0.051     | 0.801  |
| <b>CSx</b>    | donorC | 0.094 | 0.829  | 0.865       | 0.029     | 0.864  |
| <b>MuSiC</b>  | data6k | 0.086 | 0.848  | 0.887       | 0.025     | 0.886  |
| <b>MuSiC</b>  | data8k | 0.136 | 0.663  | 0.728       | 0.056     | 0.725  |
| <b>MuSiC</b>  | donorA | 0.1   | 0.811  | 0.883       | 0.031     | 0.88   |
| <b>MuSiC</b>  | donorC | 0.084 | 0.897  | 0.896       | 0.017     | 0.896  |
| <b>Scaden</b> | data6k | 0.104 | 0.747  | 0.83        | 0.042     | 0.825  |
| <b>Scaden</b> | data8k | 0.133 | 0.625  | 0.73        | 0.063     | 0.722  |
| <b>Scaden</b> | donorA | 0.035 | 0.92   | 0.988       | 0.013     | 0.985  |
| <b>Scaden</b> | donorC | 0.046 | 0.849  | 0.973       | 0.025     | 0.964  |

803 **Table S5** Deconvolution evaluation on simulated PBMC data.

804

805

| Method        | Celltype | RMSE  | Correlation | Slope | Intercept | CCC   |
|---------------|----------|-------|-------------|-------|-----------|-------|
| <b>CSx</b>    | ALPHA    | 0.282 | 0.816       | 0.691 | 0.431     | 0.375 |
| <b>CSx</b>    | BETA     | 0.309 | 0.833       | 0.175 | -0.017    | 0.078 |
| <b>CSx</b>    | DELTA    | 0.04  | 0.812       | 1.567 | -0.013    | 0.647 |
| <b>CSx</b>    | GAMMA    | 0.052 | 0.921       | 1.131 | 0.0       | 0.897 |
| <b>CSx</b>    | Total    | 0.212 | 0.79        | 1.113 | -0.028    | 0.746 |
| <b>MuSiC</b>  | ALPHA    | 0.11  | 0.887       | 1.108 | -0.042    | 0.863 |
| <b>MuSiC</b>  | BETA     | 0.148 | 0.752       | 1.067 | 0.017     | 0.694 |
| <b>MuSiC</b>  | DELTA    | 0.023 | 0.817       | 0.716 | -0.003    | 0.707 |
| <b>MuSiC</b>  | GAMMA    | 0.068 | 0.881       | 0.552 | -0.003    | 0.711 |
| <b>MuSiC</b>  | Total    | 0.099 | 0.938       | 1.078 | -0.019    | 0.929 |
| <b>Scaden</b> | ALPHA    | 0.067 | 0.949       | 1.071 | -0.034    | 0.942 |
| <b>Scaden</b> | BETA     | 0.07  | 0.936       | 1.152 | -0.045    | 0.916 |
| <b>Scaden</b> | DELTA    | 0.024 | 0.807       | 1.012 | 0.008     | 0.764 |
| <b>Scaden</b> | GAMMA    | 0.045 | 0.914       | 0.89  | -0.008    | 0.901 |
| <b>Scaden</b> | Total    | 0.055 | 0.978       | 1.033 | -0.008    | 0.976 |

806 **Table S6** Deconvolution performance on simulated pancreas data from Xin et al..

807

808

809

| Tissue      | Name    | # Samples | Reference                                 |
|-------------|---------|-----------|-------------------------------------------|
| PBMC        | PBMC1   | 12        | Zimmermann et al., PLOS one, 2016         |
| PBMC        | PBMC2   | 12        | Monaco et al., Cell Reports, 2019         |
| Pancreas    | Xin     | 18        | Xin et al., Cell Metab., 2016             |
| Human Brain | ROSMAP  | 390       | Bennett et al., Curr Alzheimer Res., 2012 |
| Ascites     | Ascites | 3         | Schelker at al., Nat. Comm. 2018          |

810 **Table S7** *Tissue RNA-seq datasets used for performance evaluation.*

811

812

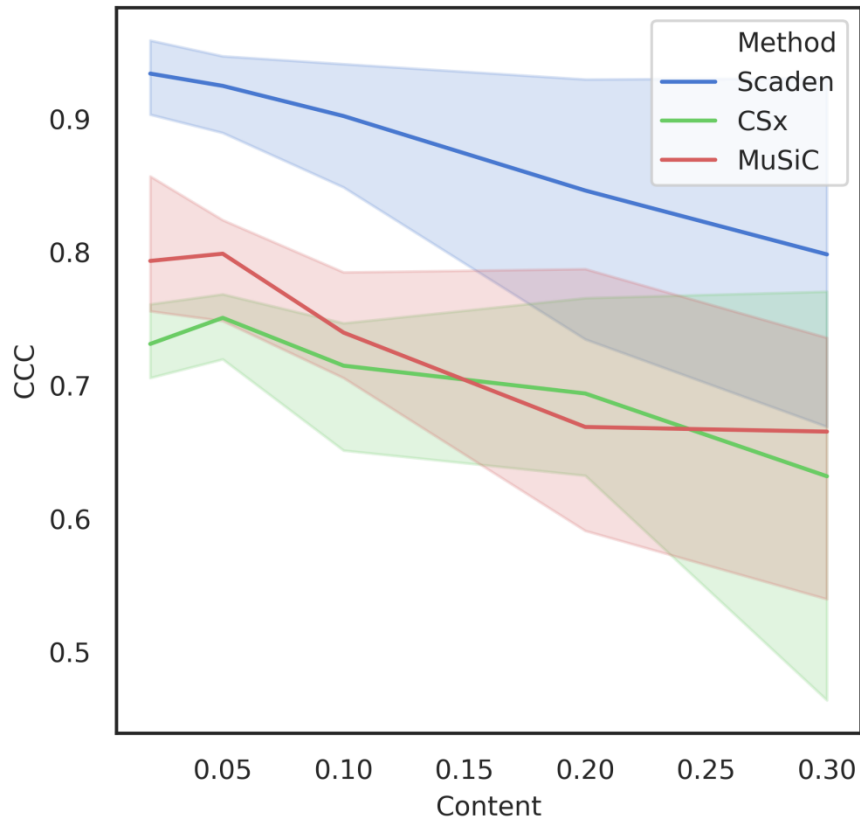

813

814 **Figure S2** Deconvolution performance on datasets with added unknown mixture contents.

815 Unknown cell type content was added to the simulated bulk mixture in fixed concentrations

816 (5%, 10%, 20%, 30%). The deconvolution performance was assessed on samples

817 generated from the data6k, donorA and donorC datasets.

818



| Method | Content | RMSE  | CCC   |
|--------|---------|-------|-------|
| CSx    | 0.02    | 0.097 | 0.731 |
| CSx    | 0.05    | 0.092 | 0.751 |
| CSx    | 0.1     | 0.092 | 0.715 |
| CSx    | 0.2     | 0.091 | 0.694 |
| CSx    | 0.3     | 0.099 | 0.632 |
| MuSiC  | 0.02    | 0.084 | 0.793 |
| MuSiC  | 0.05    | 0.083 | 0.799 |
| MuSiC  | 0.1     | 0.089 | 0.739 |
| MuSiC  | 0.2     | 0.095 | 0.669 |
| MuSiC  | 0.3     | 0.101 | 0.665 |
| Scaden | 0.02    | 0.041 | 0.934 |
| Scaden | 0.05    | 0.044 | 0.925 |
| Scaden | 0.1     | 0.046 | 0.902 |
| Scaden | 0.2     | 0.054 | 0.846 |
| Scaden | 0.3     | 0.063 | 0.798 |

819

820 **Table S8** *Deconvolution performance on datasets with added unknown mixture*

821 *contents.*

822

823

| Method        | Dataset | Celltype | RMSE  | Correlation | Slope  | Intercept | CCC    |
|---------------|---------|----------|-------|-------------|--------|-----------|--------|
| <b>CPM</b>    | PBMC1   | Total    | 0.18  | -0.003      | -0.003 | 0.167     | -0.003 |
| <b>CPM</b>    | PBMC2   | Total    | 0.114 | -0.203      | -0.094 | 0.182     | -0.155 |
| <b>CS</b>     | PBMC1   | Total    | 0.147 | 0.437       | 0.491  | 0.085     | 0.434  |
| <b>CS</b>     | PBMC2   | Total    | 0.101 | 0.594       | 0.754  | 0.041     | 0.577  |
| <b>CSx</b>    | PBMC1   | Total    | 0.16  | 0.603       | 0.925  | 0.012     | 0.552  |
| <b>CSx</b>    | PBMC2   | Total    | 0.13  | 0.456       | 0.67   | 0.055     | 0.424  |
| <b>MuSiC</b>  | PBMC1   | Total    | 0.316 | -0.235      | -0.468 | 0.245     | -0.189 |
| <b>MuSiC</b>  | PBMC2   | Total    | 0.299 | -0.197      | -0.542 | 0.257     | -0.127 |
| <b>Scaden</b> | PBMC1   | Total    | 0.104 | 0.722       | 0.805  | 0.032     | 0.717  |
| <b>Scaden</b> | PBMC2   | Total    | 0.052 | 0.855       | 0.848  | 0.025     | 0.855  |

824 **Table S9** *Deconvolution performance on real PBMC RNA-seq datasets PBMC1 and*

825 *PBMC2.*

826

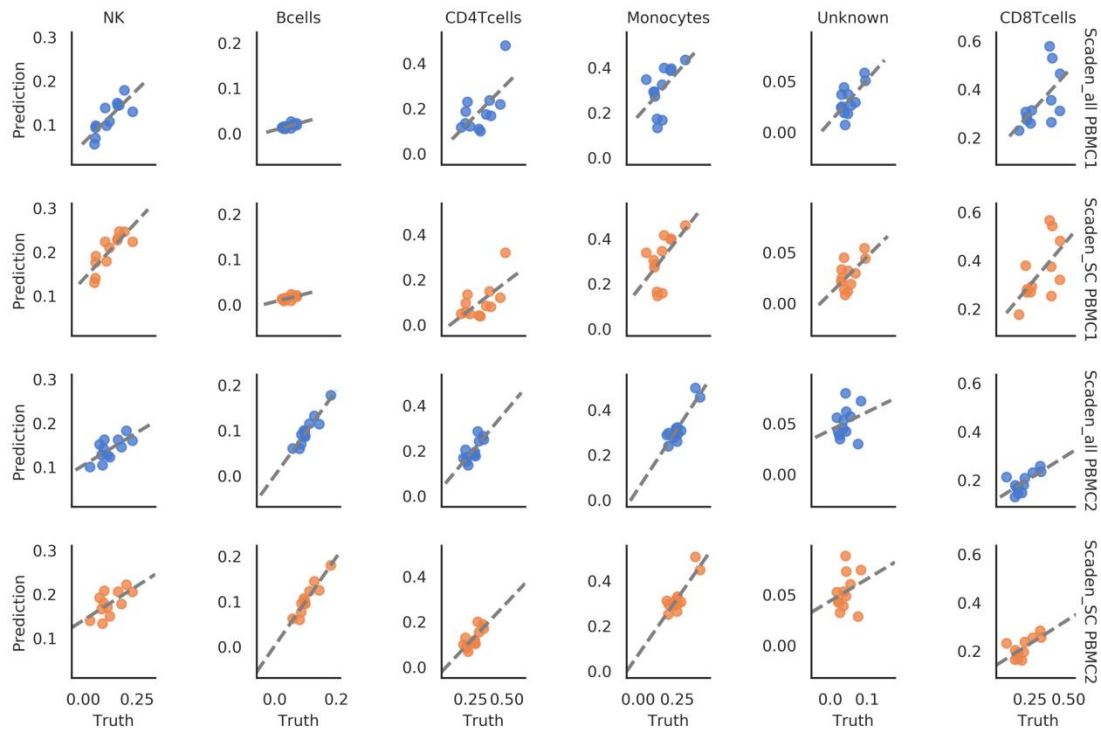

827

828 **Figure S3** Comparison of Scaden deconvolution results on PBMC1 and PBMC2 datasets

829 with and without (Scaden\_all, Scaden\_SC, respectively) bulk RNA-seq samples included in

830 training data.

831

832

| Method     | Dataset | Celltype  | RMSE  | Correlation | Slope | Intercept | CCC   |
|------------|---------|-----------|-------|-------------|-------|-----------|-------|
| Scaden_SC  | PBMC1   | Total     | 0.131 | 0.564       | 0.644 | 0.059     | 0.559 |
| Scaden_SC  | PBMC2   | Total     | 0.077 | 0.684       | 0.689 | 0.052     | 0.684 |
| Scaden_all | PBMC1   | Total     | 0.104 | 0.722       | 0.805 | 0.032     | 0.717 |
| Scaden_all | PBMC2   | Total     | 0.052 | 0.855       | 0.848 | 0.025     | 0.855 |
| Scaden_SC  | PBMC1   | Bcells    | 0.033 | 0.648       | 0.172 | 0.006     | 0.083 |
| Scaden_SC  | PBMC1   | CD4Tcells | 0.228 | 0.633       | 0.492 | -0.055    | 0.149 |
| Scaden_SC  | PBMC1   | CD8Tcells | 0.101 | 0.603       | 0.761 | 0.108     | 0.562 |
| Scaden_SC  | PBMC1   | Monocytes | 0.178 | 0.556       | 0.885 | 0.173     | 0.186 |
| Scaden_SC  | PBMC1   | NK        | 0.087 | 0.81        | 0.531 | 0.137     | 0.312 |
| Scaden_SC  | PBMC1   | Unknown   | 0.029 | 0.577       | 0.361 | 0.009     | 0.287 |
| Scaden_SC  | PBMC2   | Bcells    | 0.012 | 0.936       | 0.977 | 0.002     | 0.935 |
| Scaden_SC  | PBMC2   | CD4Tcells | 0.145 | 0.767       | 0.682 | -0.057    | 0.119 |
| Scaden_SC  | PBMC2   | CD8Tcells | 0.049 | 0.67        | 0.403 | 0.129     | 0.587 |
| Scaden_SC  | PBMC2   | Monocytes | 0.078 | 0.865       | 0.994 | 0.071     | 0.558 |
| Scaden_SC  | PBMC2   | NK        | 0.071 | 0.629       | 0.314 | 0.14      | 0.276 |
| Scaden_SC  | PBMC2   | Unknown   | 0.025 | 0.247       | 0.217 | 0.044     | 0.209 |
| Scaden_all | PBMC1   | Bcells    | 0.031 | 0.668       | 0.188 | 0.007     | 0.1   |
| Scaden_all | PBMC1   | CD4Tcells | 0.151 | 0.638       | 0.652 | -0.017    | 0.345 |
| Scaden_all | PBMC1   | CD8Tcells | 0.096 | 0.6         | 0.704 | 0.123     | 0.569 |
| Scaden_all | PBMC1   | Monocytes | 0.172 | 0.518       | 0.777 | 0.184     | 0.177 |
| Scaden_all | PBMC1   | NK        | 0.036 | 0.804       | 0.488 | 0.058     | 0.71  |
| Scaden_all | PBMC1   | Unknown   | 0.026 | 0.64        | 0.41  | 0.01      | 0.365 |
| Scaden_all | PBMC2   | Bcells    | 0.013 | 0.936       | 0.94  | 0.0       | 0.917 |
| Scaden_all | PBMC2   | CD4Tcells | 0.074 | 0.772       | 0.769 | -0.005    | 0.373 |
| Scaden_all | PBMC2   | CD8Tcells | 0.051 | 0.672       | 0.398 | 0.106     | 0.562 |
| Scaden_all | PBMC2   | Monocytes | 0.072 | 0.895       | 1.058 | 0.049     | 0.614 |
| Scaden_all | PBMC2   | NK        | 0.045 | 0.69        | 0.301 | 0.103     | 0.467 |
| Scaden_all | PBMC2   | Unknown   | 0.023 | 0.241       | 0.178 | 0.043     | 0.203 |

833 **Table S10** Deconvolution performance on real PBMC RNA-seq data for Scaden models  
 834 trained only on scRNA-seq simulated tissues (Scaden\_SC) or on a mix of simulated and real  
 835 tissue data (Scaden\_all).

836

| Method        | Type  | CCC   | Correlation | Intercept | RMSE  | Slope |
|---------------|-------|-------|-------------|-----------|-------|-------|
| <b>CPM</b>    | Total | -0.0  | 0.004       | 0.153     | 0.183 | -0.0  |
| <b>CSx</b>    | Total | 0.938 | 0.952       | 0.002     | 0.069 | 1.115 |
| <b>MuSiC</b>  | Total | 0.876 | 0.907       | 0.033     | 0.079 | 0.696 |
| <b>Scaden</b> | Total | 0.948 | 0.955       | -0.030    | 0.061 | 1.066 |

837 **Table S11** *Deconvolution performance on real Ascites RNA-seq data.*

838

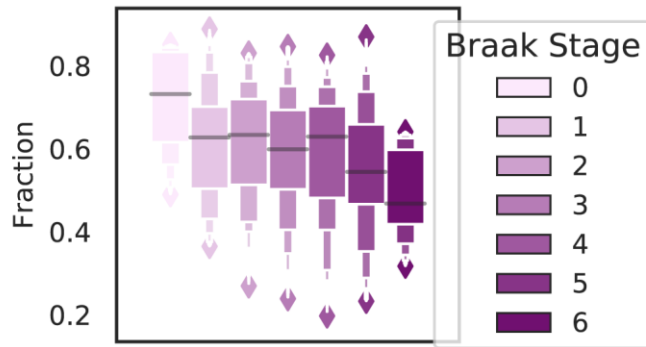

839

840 **Figure S4** *Deconvolution performance on real human brain RNA-seq data.* Scaden was  
841 trained on mouse scRNA-seq data and the trained model was used to deconvolve cell  
842 fractions of ROSMAP human brain RNA-seq data. This data does not contain cell fraction  
843 ground-truth information. Instead, the box plot shows the decrease of neuronal cell fractions  
844 with increasing Braak disease stage, a well-known phenomenon in AD.

845

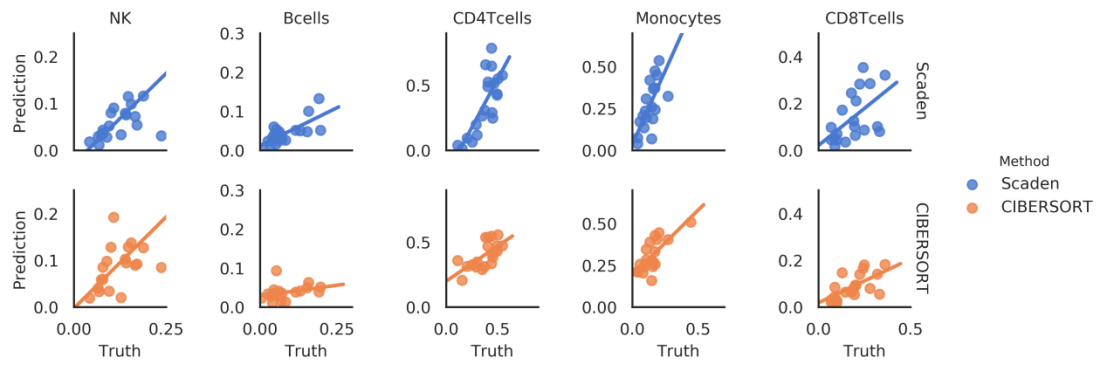

846

847 **Figure S5** Deconvolution performance comparison of CS (LM22) and Scaden on the

848 GSE65133 PBMC microarray dataset.

849

850

| Method | Celltype  | CCC   | Correlation | Intercept | RMSE  | Slope |
|--------|-----------|-------|-------------|-----------|-------|-------|
| CS     | Bcells    | 0.122 | 0.33        | 0.029     | 0.068 | 0.109 |
| CS     | CD4Tcells | 0.629 | 0.658       | 0.199     | 0.095 | 0.537 |
| CS     | CD8Tcells | 0.285 | 0.635       | 0.018     | 0.12  | 0.375 |
| CS     | Monocytes | 0.295 | 0.741       | 0.19      | 0.17  | 0.779 |
| CS     | NK        | 0.623 | 0.698       | -0.003    | 0.059 | 0.78  |
| CS     | Total     | 0.717 | 0.728       | 0.026     | 0.11  | 0.869 |
| Scaden | Bcells    | 0.431 | 0.728       | 0.012     | 0.055 | 0.388 |
| Scaden | CD4Tcells | 0.64  | 0.778       | -0.195    | 0.153 | 1.474 |
| Scaden | CD8Tcells | 0.474 | 0.543       | 0.02      | 0.104 | 0.635 |
| Scaden | Monocytes | 0.43  | 0.838       | 0.033     | 0.191 | 1.764 |
| Scaden | NK        | 0.516 | 0.741       | -0.029    | 0.074 | 0.77  |
| Scaden | Total     | 0.705 | 0.749       | -0.015    | 0.126 | 1.067 |

851 **Table S12** *Deconvolution performance on real PBMC microarray data.*

852



853

| Software      | Version     |
|---------------|-------------|
| pandas        | 0.23.4      |
| Python        | 3.6.8       |
| Tensorflow    | 1.10.0      |
| matplotlib    | 2.2.3       |
| nb_conda      | 2.2.1       |
| numpy         | 1.15.0      |
| scipy         | 1.1.0       |
| seaborn       | 0.9.0       |
| anndata       | 0.6.9       |
| scanpy        | 1.2.2       |
| scikit-learn  | 0.20.0      |
| ipython       | 6.5.0       |
| python-igraph | 0.7.1.post6 |
| louvain       | 0.6.1       |
| tqdm          | 4.7.2       |
| igraph        | 0.7.1       |

854 **Table S13** *Software packages and versions used.*

855

856

| Target Cell Type | LM22 Cell Types                                                                                                                             |
|------------------|---------------------------------------------------------------------------------------------------------------------------------------------|
| B cells          | B cells naive, B cells memory                                                                                                               |
| CD8 T cells      | T cells CD8, T cells follicular helper, T cells gamma delta                                                                                 |
| CD4 T cells      | T cells CD4 naive, T cells regulatory (Tregs), T cells CD4 memory resting, T cells CD4 memory activated                                     |
| NK               | NK cells resting, NK cells activated                                                                                                        |
| Dendritic        | Dendritic cells resting, Dendritic cells activated                                                                                          |
| Monocytes        | Monocytes, Macrophages M0, Macrophages M1, Macrophages M2                                                                                   |
| Unknown          | Mast cells resting, Mast cells activated, Eosinophils, T cells follicular helper, T cells gamma delta, Plasma cells, Neutrophils, Dendritic |

857 **Table S14** Mapping of the LM22 GEP to cell types.

858
